# Supplementary material for: Ionic liquid prolongs DNA translocation through graphene nanopores
Source: Royal Society of Chemistry journal article supplement (doi:10.1039/c6ra07017e), 2016-01-01
Supplement: c6ra07017e1.pdf [file c6ra07017e1.pdf]

## Supporting information

### Ionic Liquid Prolongs DNA Translocation through Graphene Nanopore

Mandar Kulkarni\*<sup>a</sup> and Arnab Mukherjee\*<sup>a</sup>

Chemistry Department, Indian Institute of Science Education and Research Pune-411008,  
Maharashtra, India

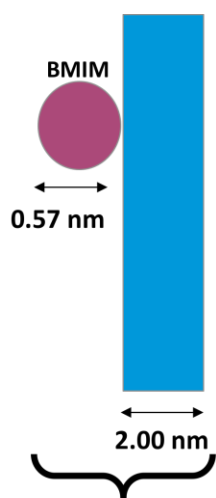

Total =  $0.57 + 2.00 = 2.57$  nm (diameter of the pore) Hence, radius of 1.30 nm. (close to 1.285 nm)

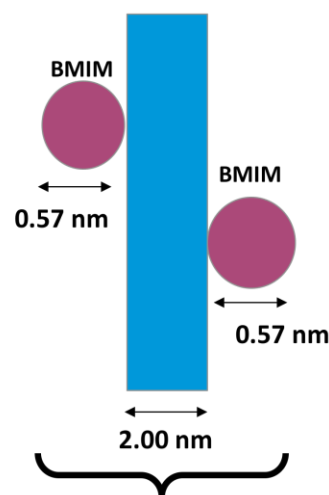

Total =  $0.57 + 2.00 + 0.57 = 3.14$  nm (diameter of the pore) Hence, radius of 1.55 nm. (close to 1.57 nm)

**Figure S1.** Schematic diagram showing choice of pore radius based on DNA and BMIM ion size.

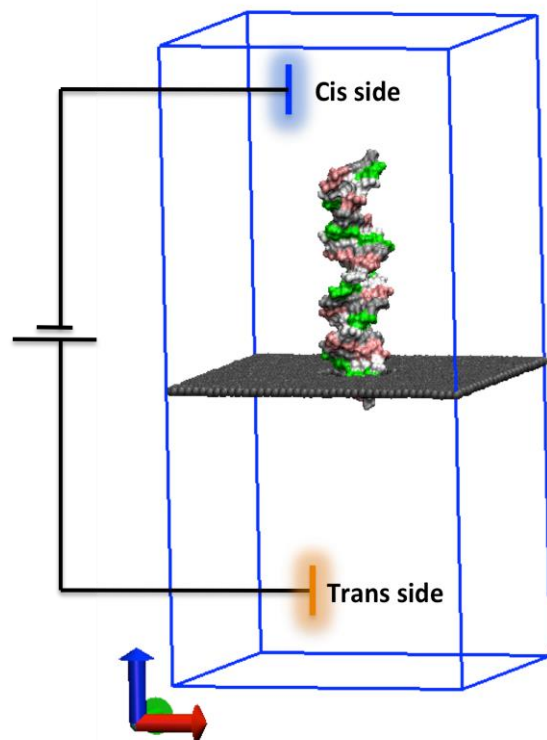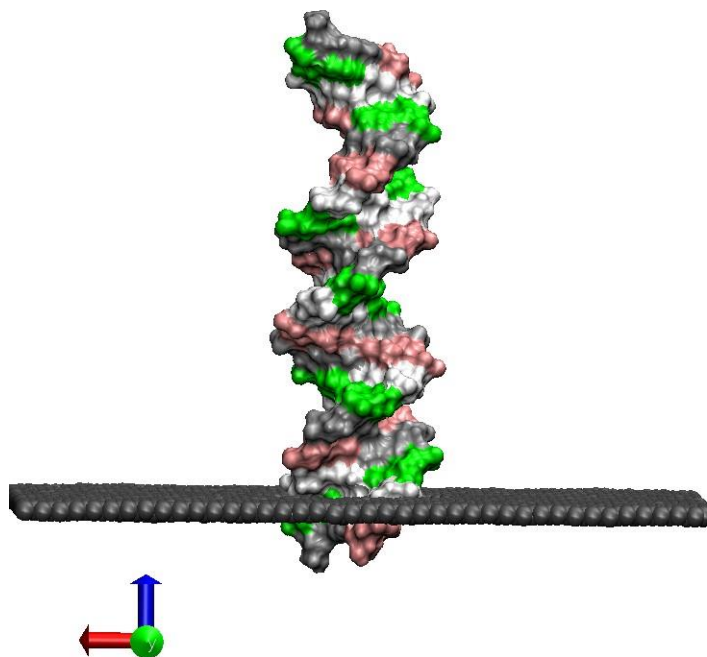

**Figure S2.** Snapshots showing initial configuration. Bottom panel is a zoomed view of the top panel.

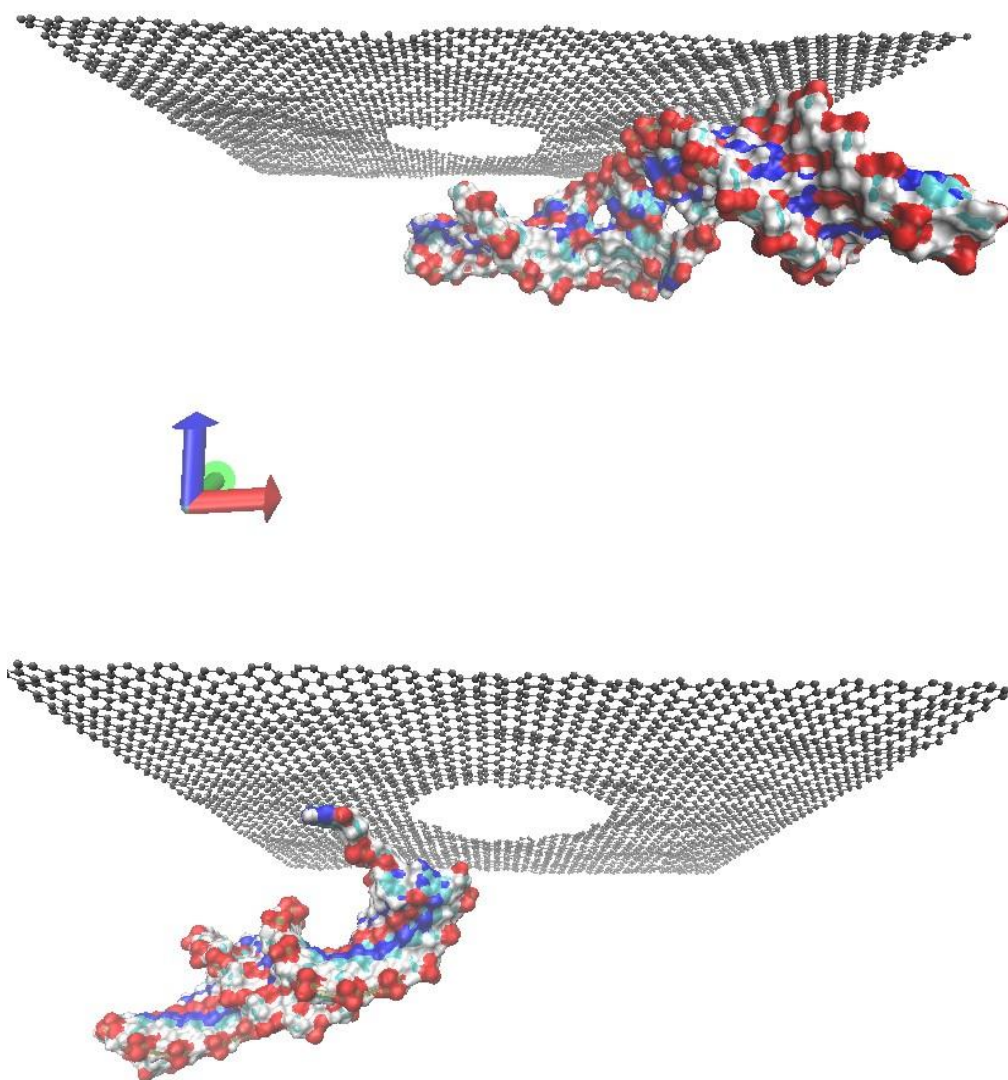

**Figure S3.** Configuration showing dG<sub>20</sub> stuck to graphene surface for nanopore of 2.6 nm diameter and voltage of 0.05 V/nm.

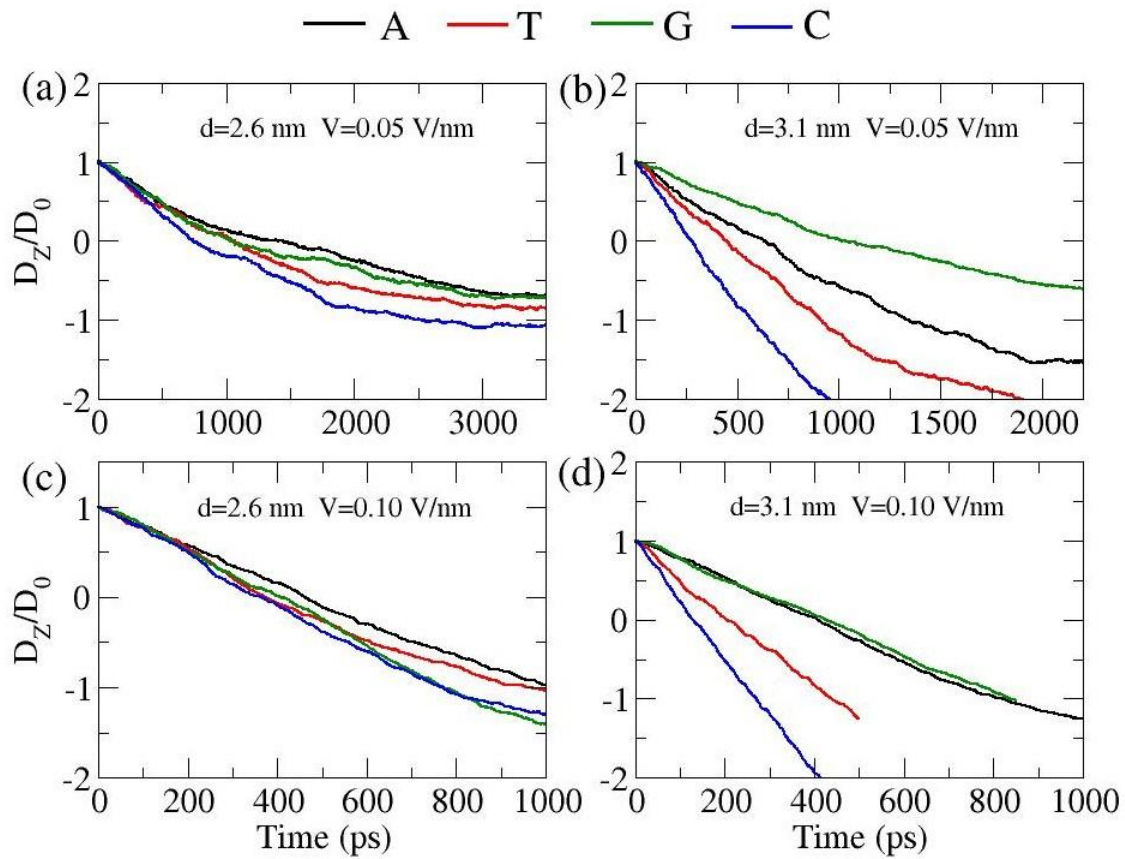

**Figure S4.** The Z-component of DNA movement ( $D_z$ ) is normalized by its value at  $t=0$  ( $D_z(t=0)$ ). We have plotted normalized movement ( $D_z/D_0$ ) in all cases. The normalized DNA COM movements for polynucleotide systems (a) Diameter ( $d$ ) = 2.6 nm,  $V=0.05$  V/nm; (b)  $d=3.1$  nm,  $V=0.05$  V/nm; (c)  $d=2.6$  nm,  $V=0.10$  V/nm; (d)  $d=3.1$  nm,  $V=0.10$  V/nm. Color indicators: A- black, T- red, G- green, C- blue.

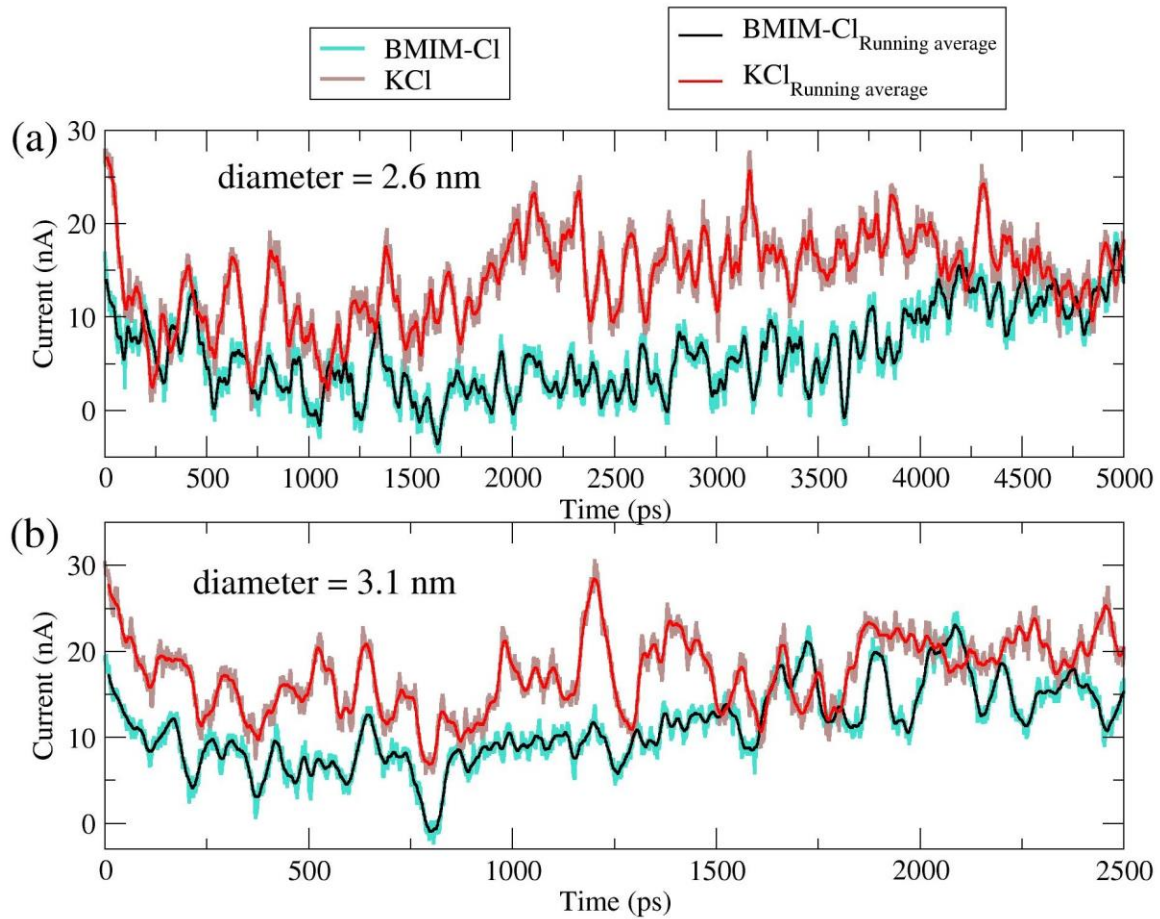

**Figure S5.** The current values for DNA translocation in case of (a) smaller nanopore ( $d = 2.6$  nm) and (b) larger nanopore ( $d = 3.1$  nm) using lag value of 50 ps in the presence of KCl (brown line) and BMIM-Cl (turquoise line). The running average are plotted for KCl (Red line) and BMIM-Cl simulations (Black line) to visually observe number of blockade events.

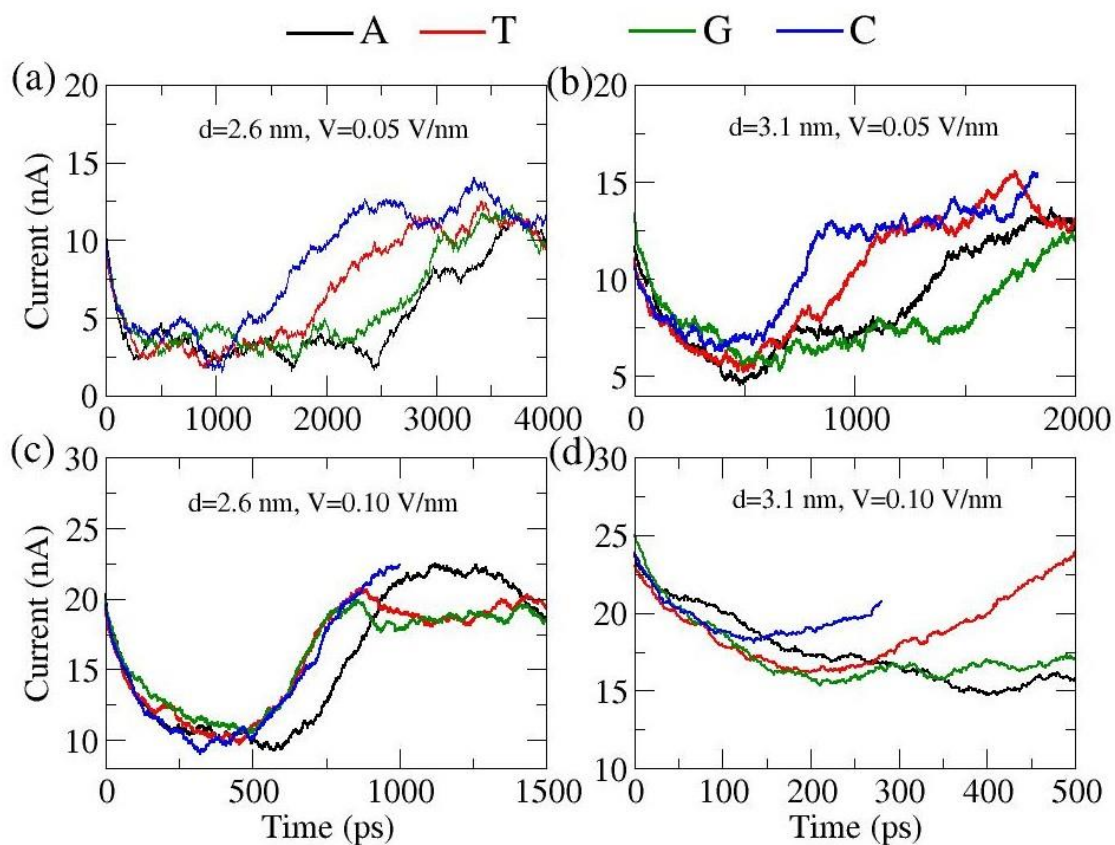

**Figure S6.** Ionic current of BMIM-Cl using lag of 250 ps for polynucleotide systems (a) Diameter ( $d$ ) = 2.6 nm,  $V=0.05$  V/nm; (b)  $d=3.1$  nm,  $V=0.05$  V/nm; (c)  $d=2.6$  nm,  $V=0.10$  V/nm; (d)  $d=3.1$  nm,  $V=0.10$  V/nm. Color indicators: A- black, T- red, G- green, C- blue.

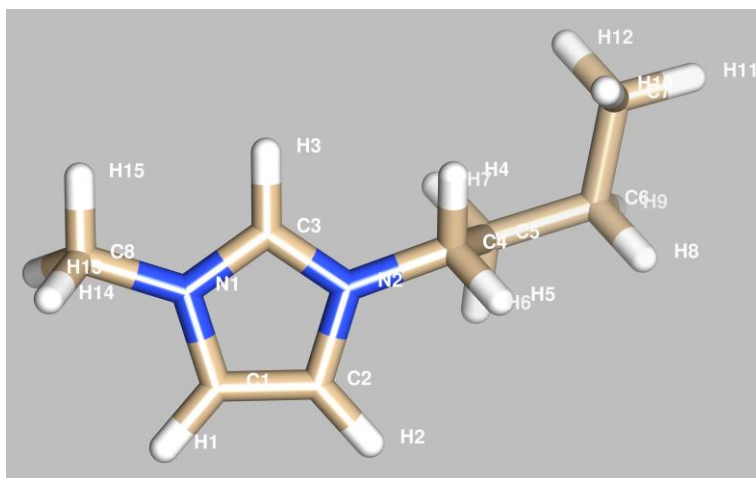

**Figure S7.** Structure of BMIM<sup>+</sup> cation

**Table S1.** Table showing details of the systems and simulations performed in this study.

| <b>Simulation ID</b> | <b>Sequence</b>      | <b>Electrolyte</b> | <b>Voltage (V/nm)</b> | <b>Pore Diameter (nm)</b> | <b>Translocation time (ns)</b> |
|----------------------|----------------------|--------------------|-----------------------|---------------------------|--------------------------------|
| 1                    | dA <sub>20</sub>     | BMIM-Cl            | 0.05                  | 2.6                       | 5.0                            |
| 2                    | dC <sub>20</sub>     | BMIM-Cl            | 0.05                  | 2.6                       | 5.0                            |
| 3                    | dG <sub>20</sub>     | BMIM-Cl            | 0.05                  | 2.6                       | 5.0                            |
| 4                    | dT <sub>20</sub>     | BMIM-Cl            | 0.05                  | 2.6                       | 5.0                            |
| 5                    | dA <sub>20</sub>     | BMIM-Cl            | 0.05                  | 3.10                      | 2.50                           |
| 6                    | dC <sub>20</sub>     | BMIM-Cl            | 0.05                  | 3.10                      | 2.50                           |
| 7                    | dG <sub>20</sub>     | BMIM-Cl            | 0.05                  | 3.10                      | 2.50                           |
| 8                    | dT <sub>20</sub>     | BMIM-Cl            | 0.05                  | 3.10                      | 2.50                           |
| 9                    | dA <sub>20</sub>     | BMIM-Cl            | 0.10                  | 2.6                       | 1.50                           |
| 10                   | dC <sub>20</sub>     | BMIM-Cl            | 0.10                  | 2.6                       | 1.50                           |
| 11                   | dG <sub>20</sub>     | BMIM-Cl            | 0.10                  | 2.6                       | 1.50                           |
| 12                   | dT <sub>20</sub>     | BMIM-Cl            | 0.10                  | 2.6                       | 1.50                           |
| 13                   | dA <sub>20</sub>     | BMIM-Cl            | 0.10                  | 3.10                      | 1.00                           |
| 14                   | dC <sub>20</sub>     | BMIM-Cl            | 0.10                  | 3.10                      | 1.00                           |
| 15                   | dG <sub>20</sub>     | BMIM-Cl            | 0.10                  | 3.10                      | 1.00                           |
| 16                   | dT <sub>20</sub>     | BMIM-Cl            | 0.10                  | 3.10                      | 1.00                           |
| 17                   | d(ACGT) <sub>5</sub> | BMIM-Cl            | 0.05                  | 2.6                       | 3.50                           |
| 18                   | d(ACGT) <sub>5</sub> | KCl                | 0.05                  | 2.6                       | 2.00                           |
| 19                   | d(ACGT) <sub>5</sub> | BMIM-Cl            | 0.05                  | 3.10                      | 1.70                           |
| 20                   | d(ACGT) <sub>5</sub> | KCl                | 0.05                  | 3.10                      | 1.10                           |

**Table S2.** The translocation time of individual runs in each case of homo-polynucleotide sequence.

d=2.6 nm V=0.05 V/nm

| Sequence | Run 1  | Run 2  | Run 3  | average | SD    |
|----------|--------|--------|--------|---------|-------|
| A        | 3090.0 | 2845.0 | 4580.0 | 3505.0  | 939.0 |
| C        | 1888.0 | 2325.0 | 1737.0 | 1983.3  | 305.4 |
| G        | 2810.0 | 3090.0 | 3190.0 | 3030.0  | 197.0 |
| T        | 2980.0 | 2360.0 | 1950.0 | 2430.0  | 518.6 |

d=2.6 nm V=0.10 V/nm

| Sequence | Run 1  | Run 2  | Run 3 | average | SD    |
|----------|--------|--------|-------|---------|-------|
| A        | 1040.0 | 1080.0 | 880.0 | 1000.0  | 105.8 |
| C        | 980.0  | 840.0  | 790.0 | 870.0   | 98.5  |
| G        | 890.0  | 920.0  | 990.0 | 933.3   | 51.3  |
| T        | 770.0  | 890.0  | 910.0 | 856.7   | 75.7  |

d=3.1 nm V=0.05 V/nm

| Sequence | Run 1  | Run 2  | Run 3  | average | SD    |
|----------|--------|--------|--------|---------|-------|
| A        | 1450.0 | 1990.0 | 1740.0 | 1726.7  | 270.2 |
| C        | 1050.0 | 1695.0 | 900.0  | 1215.0  | 422.4 |
| G        | 2253.0 | 2360.0 | 1961.0 | 2191.3  | 206.5 |
| T        | 1263.0 | 1330.0 | 1020.0 | 1204.3  | 163.1 |

d=3.1 nm V=0.10 V/nm

| Sequence | Run 1 | Run 2  | Run 3 | average | SD   |
|----------|-------|--------|-------|---------|------|
| A        | 890.0 | 1026.0 | 844.0 | 920.0   | 94.6 |
| C        | 374.0 | 488.0  | 506.0 | 456.0   | 71.6 |
| G        | 842.0 | 840.0  | 840.0 | 840.7   | 1.2  |
| T        | 626.0 | 540.0  | 685.0 | 617.0   | 72.9 |



**Table S3.** The blockade current of individual runs in each case of homo-polynucleotide sequence.

**Blockade Current (nA) lag 250 ps**

d=2.6 nm V=0.05 V/nm

| Sequence | Run 1 | Run 2 | Run 3 | average | SD   |
|----------|-------|-------|-------|---------|------|
| A        | 3.44  | 4.53  | 4.17  | 4.05    | 0.56 |
| C        | 5.78  | 5.13  | 4.26  | 5.06    | 0.76 |
| G        | 4.21  | 4.88  | 4.20  | 4.43    | 0.39 |
| T        | 4.07  | 3.74  | 4.76  | 4.19    | 0.52 |

d=2.6 nm V=0.10 V/nm

| Sequence | Run 1 | Run 2 | Run 3 | average | SD   |
|----------|-------|-------|-------|---------|------|
| A        | 14.13 | 11.59 | 13.44 | 13.05   | 1.31 |
| C        | 13.16 | 13.57 | 12.65 | 13.13   | 0.46 |
| G        | 15.51 | 14.31 | 13.41 | 14.41   | 1.05 |
| T        | 14.48 | 12.02 | 14.54 | 13.68   | 1.44 |

d=3.1 nm V=0.05 V/nm

| Sequence | Run 1 | Run 2 | Run 3 | average | SD   |
|----------|-------|-------|-------|---------|------|
| A        | 7.74  | 8.05  | 8.23  | 8.01    | 0.25 |
| C        | 9.95  | 8.73  | 8.69  | 9.12    | 0.72 |
| G        | 9.19  | 7.38  | 8.33  | 8.30    | 0.90 |
| T        | 6.85  | 8.52  | 8.49  | 7.95    | 0.96 |

d=3.1 nm V=0.10 V/nm

| Sequence | Run 1 | Run 2 | Run 3 | average | SD   |
|----------|-------|-------|-------|---------|------|
| A        | 19.13 | 17.88 | 19.89 | 18.97   | 1.01 |
| C        | 21.37 | 19.31 | 21.85 | 20.84   | 1.35 |
| G        | 19.63 | 18.88 | 18.56 | 19.02   | 0.55 |
| T        | 20.71 | 19.58 | 19.37 | 19.89   | 0.72 |
